# Supplementary material for: Metal complex analogues of crown ethers as the preorganized motif to stabilize aquated proton in solid state
Source: Royal Society of Chemistry journal article supplement (doi:10.1039/c3ce27075k), 2013-01-01
Supplement: c3ce27075k.pdf [file c3ce27075k.pdf]

## **Electronic Supplementary Information**

**For**

**Metal complex analogues of crown ethers as the preorganized motif to stabilize aquated proton in solid state**

**Arpita Jana, Thomas Weyhermueller and Sasankasekhar Mohanta\***

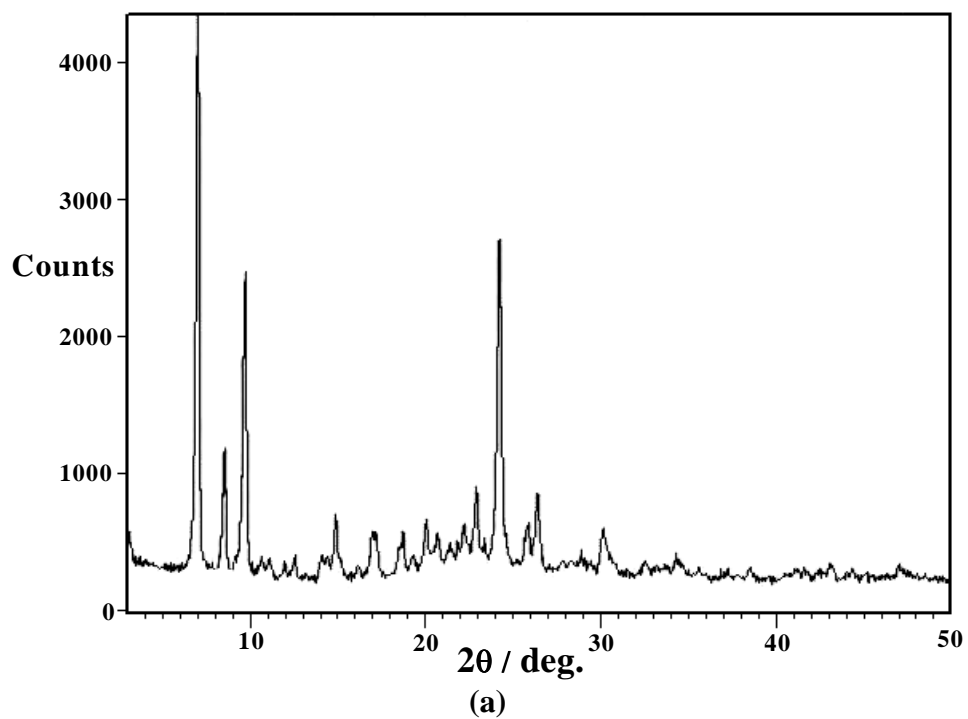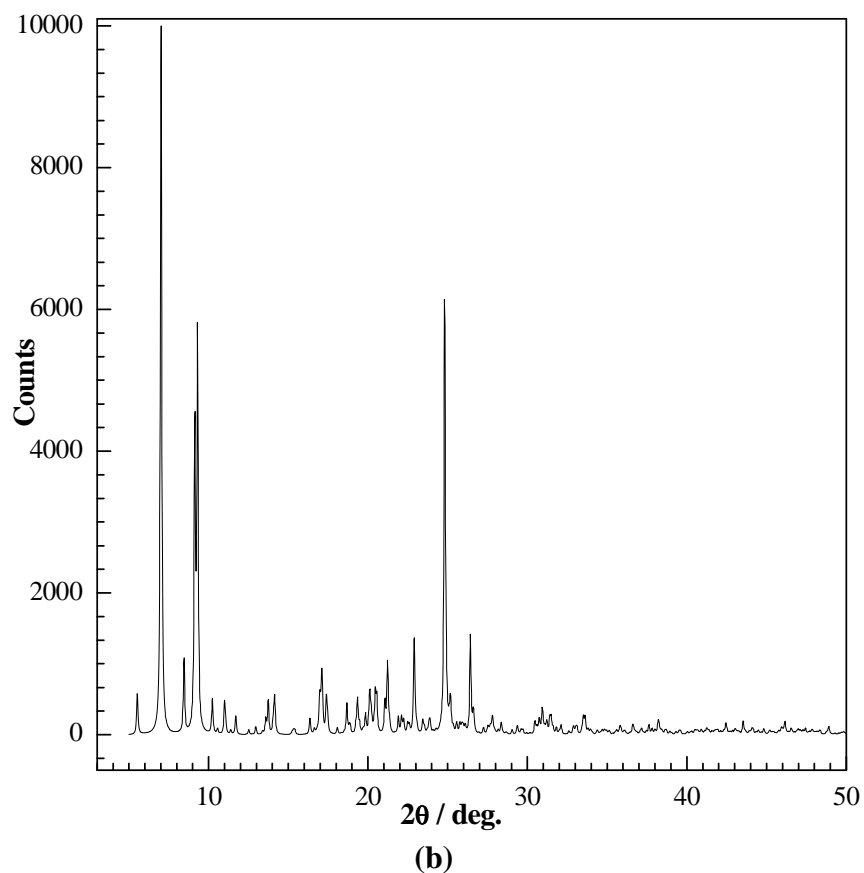

**Fig. S1.** Powder XRD pattern of  $[\{\text{Cu}^{\text{II}}\text{L}^{\text{hex}}\}_2(\text{H}_5\text{O}_2)](\text{ClO}_4)$  (**2**): (a) Observed; (b) Simulated (using MERCURY Program) on the basis of single crystal diffraction data.

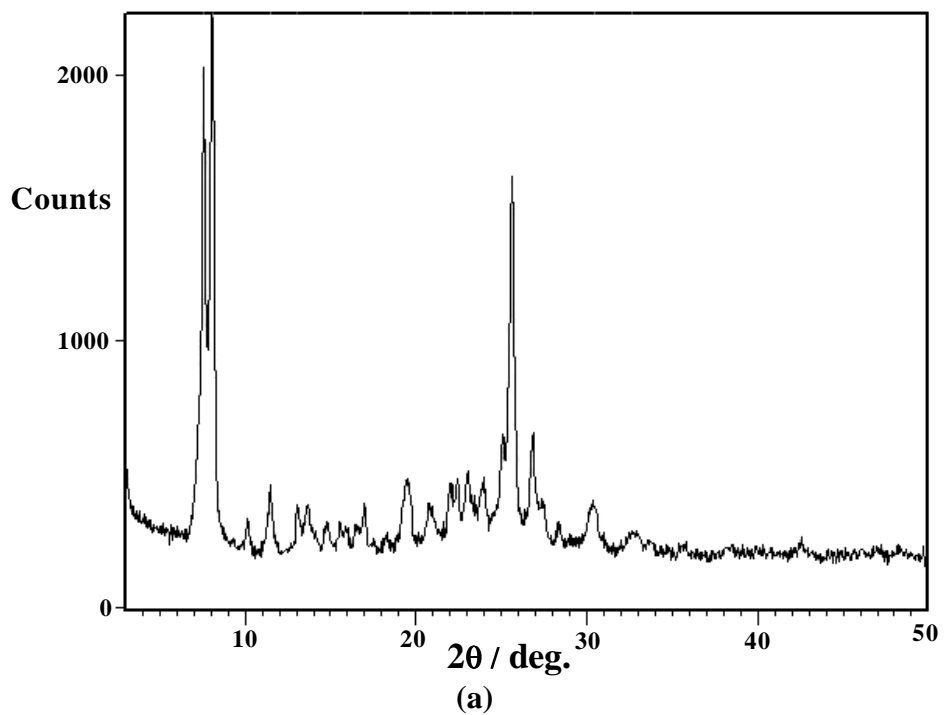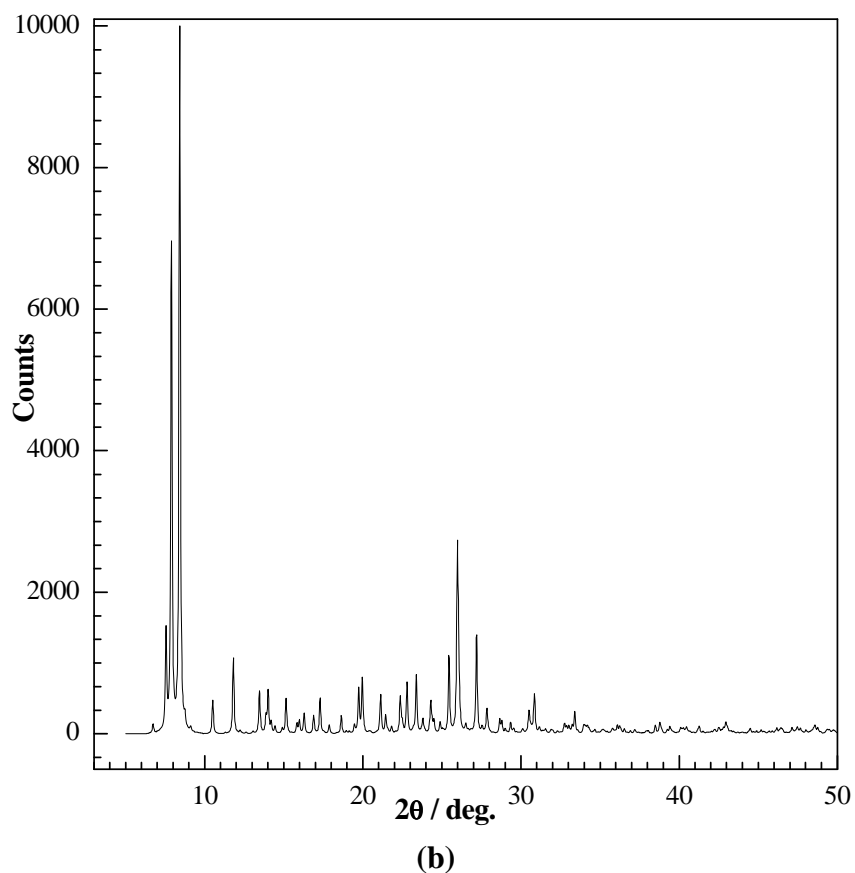

**Fig. S2.** Powder XRD pattern of  $[\{\text{Cu}^{\text{II}}\text{L}^{\text{en}}\}_2(\text{H}_5\text{O}_2)](\text{ClO}_4)$  (**3**): (a) Observed; (b) Simulated (using MERCURY Program) on the basis of single crystal diffraction data.

**Table S1**  
 Bond lengths (Å) and bond angles (°) for the copper(II) centres of **1** and **2**

|            | Bond lengths |          | Bond angles     |            |            |
|------------|--------------|----------|-----------------|------------|------------|
|            | <b>1</b>     | <b>2</b> |                 | <b>1</b>   | <b>2</b>   |
| Cu(1)–O(1) | 1.914(2)     | 1.924(3) | N(1)–Cu(1)–O(2) | 177.78(10) | 172.86(16) |
| Cu(1)–O(2) | 1.920(2)     | 1.910(3) | N(2)–Cu(1)–O(1) | 177.50(10) | 174.74(16) |
| Cu(1)–N(1) | 1.949(3)     | 1.936(4) | N(1)–Cu(1)–N(2) | 84.19(11)  | 84.11(18)  |
| Cu(1)–N(2) | 1.946(3)     | 1.934(4) | N(1)–Cu(1)–O(1) | 93.32(11)  | 93.73(17)  |
|            |              |          | N(2)–Cu(1)–O(2) | 93.60(10)  | 92.84(16)  |
|            |              |          | O(1)–Cu(1)–O(2) | 88.90(9)   | 89.84(14)  |
| Cu(2)–O(5) | 1.898(2)     | 1.893(3) | N(3)–Cu(2)–O(6) | 175.39(11) | 171.50(15) |
| Cu(2)–O(6) | 1.902(2)     | 1.889(3) | N(4)–Cu(2)–O(5) | 173.19(11) | 168.73(16) |
| Cu(2)–N(3) | 1.937(3)     | 1.913(4) | N(3)–Cu(2)–N(4) | 84.16(11)  | 84.47(17)  |
| Cu(2)–N(4) | 1.946(3)     | 1.935(4) | N(3)–Cu(2)–O(5) | 94.04(10)  | 93.53(15)  |
|            |              |          | N(4)–Cu(2)–O(6) | 93.60(10)  | 93.55(15)  |
|            |              |          | O(5)–Cu(2)–O(6) | 88.65(9)   | 89.99(13)  |

**Table S2**  
 Bond lengths (Å) and bond angles (°) for the copper(II) centres of **3**

| Unit-I          |            | Unit-II           |            |
|-----------------|------------|-------------------|------------|
| Cu(1)–O(1)      | 1.914(2)   | Cu(3)–O(9)        | 1.920(2)   |
| Cu(1)–O(2)      | 1.941(2)   | Cu(3)–O(10)       | 1.931(2)   |
| Cu(1)–N(1)      | 1.947(3)   | Cu(3)–N(5)        | 1.940(3)   |
| Cu(1)–N(2)      | 1.931(3)   | Cu(3)–N(6)        | 1.937(3)   |
| Cu(2)–O(5)      | 1.924(2)   | Cu(4)–O(13)       | 1.934(2)   |
| Cu(2)–O(6)      | 1.902(2)   | Cu(4)–O(14)       | 1.903(2)   |
| Cu(2)–N(3)      | 1.930(3)   | Cu(4)–N(7)        | 1.933(3)   |
| Cu(2)–N(4)      | 1.938(3)   | Cu(4)–N(8)        | 1.941(3)   |
|                 |            |                   |            |
| N(1)–Cu(1)–O(2) | 175.41(11) | N(5)–Cu(3)–O(10)  | 174.83(11) |
| N(2)–Cu(1)–O(1) | 176.44(11) | N(6)–Cu(3)–O(9)   | 176.65(11) |
| N(1)–Cu(1)–N(2) | 84.00(12)  | N(5)–Cu(3)–N(6)   | 84.17(12)  |
| N(1)–Cu(1)–O(1) | 92.48(11)  | N(5)–Cu(3)–O(9)   | 92.49(11)  |
| N(2)–Cu(1)–O(2) | 92.44(11)  | N(6)–Cu(3)–O(10)  | 92.14(11)  |
| O(1)–Cu(1)–O(2) | 91.10(9)   | O(9)–Cu(3)–O(10)  | 91.20(9)   |
| N(3)–Cu(2)–O(6) | 176.95(12) | N(7)–Cu(4)–O(14)  | 177.01(13) |
| N(4)–Cu(2)–O(5) | 173.75(12) | N(8)–Cu(4)–O(13)  | 172.94(12) |
| N(3)–Cu(2)–N(4) | 84.69(13)  | N(7)–Cu(4)–N(8)   | 84.19(15)  |
| N(3)–Cu(2)–O(5) | 92.06(11)  | N(7)–Cu(4)–O(13)  | 92.21(13)  |
| N(4)–Cu(2)–O(6) | 92.95(12)  | N(8)–Cu(4)–O(14)  | 92.91(13)  |
| O(5)–Cu(2)–O(6) | 90.46(10)  | O(13)–Cu(4)–O(14) | 90.75(10)  |

**Table S3**

The O–H distances (Å) in H<sub>5</sub>O<sub>2</sub><sup>+</sup> moiety involving the central hydrogen atom in **1–3**

|                | <b>1</b> | <b>2</b> | <b>3, Unit-I</b> | <b>3, Unit-II</b> |
|----------------|----------|----------|------------------|-------------------|
| O(1W)–H(1WC)   | 0.82(5)  | 1.11(8)  | 1.132            |                   |
| O(2W)···H(1WC) | 1.66(5)  | 1.40(8)  | 1.352            |                   |
| O(3W)–H(3WC)   |          |          |                  | 1.019             |
| O(4W)···H(3WC) |          |          |                  | 1.446             |
